# Supplementary material
Source: MDPI journal article supplement (https://www.mdpi.com/2673-7272/3/4/36)
Supplement: s1 [file s1]

**File S1: Ovid MEDLINE(R) ALL <1946 to May 25, 2023>**

- 1 exp gender identity/ or (gender\* or sex\* or boy\* or girl\* or women\* or men\* or male\* or female\* or "gender identity\*" or "non-binary" or transgender or Trans or Queer or "Gender diverse\*" or "Gender minority\*" or intersex\* or "same sex").ti. **1221196**
- 2 ("Sexual identity\*" or heterosexual or homosexual or bisexual or pansexual or asexual or LGBTQIA or LGBTQi or LGBT or Gay or Lesbian).ti. **15637**
- 3 1 or 2 **1226939**
- 4 limit 3 to humans **915583**
- 5 exp Disasters/ or exp Natural Disasters/ or exp Weather/ or landslides/ or tsunamis/ or volcanic eruptions/ or Pandemics/ or (natural disaster\* or avalanche\* or cyclonic storm\* or earthquake\* or flood\* or landslide\* or tidal wave\* or tornado\* or wildfire\* or weather\* or extreme heat\* or Extreme weather\* or lightning or rain\* or temperature\* or wind\* or landslide\* or tsunami\* or volcanic eruption\* or "chemical spills" or "chemical leakage" or "Oil spill" or Pandemic\*).ti,ab. or (Disaster\* or disaster emergenc\* or "disaster management" or "disaster response" or "disaster recovery" or "emergency preparedness" or "emergency management" or "strategic stockpile" or "relief work" or "Disaster Planning" or "disaster plan" or "inclusive preparedness" or "inclusive emergency management" or "disability inclusive disaster risk reduction" or "disaster risk education" or "DIDRR" or "DRR" or "EPRR").ti,ab. **1668083**
- 6 exp disabled persons/ or (disab\* or handicap\* or disabled Person\* or mental retard\* or development\* disability\* or learning disorder\* or cognitive\* or hearing impair\* or "hearing loss" or "hearing disorder" or "Intellectual Disability" or "intellectual disorder" or "Cri-du-Chat Syndrome" or "down syndrome" or "de lange syndrome" or "Mental retardation" or "Rubinstein Taybi syndrome" or "trisomy 13" or "WAGR syndrome" or "Williams Syndrome" or "Prader Willi syndrome" or "genetic disorder" or "Vision disorder" or vision impair\* or blind\* or low vision\* or "visual disorder" or "language development disorder" or "speech disorder" or "communication disorder" or "communication disability" or mutism or deaf\* or "sign language" or Auslan or "auditory processing disorder" or "speech delay" or "language delay" or "semantic pragmatic disorder" or "Brain Injury" or autism\* or autisic\* or kanner\* syndrome\* or "Chronic brain damage" or "Cerebral Palsy" or neurodiverse\* or "Spinal dysraphism" or "Spinal bifida" or "Mental disorder" or psych\* disorder\* or psych\* disab\* or "motor disorder" or "neuro cognitive disorder" or "neurodevelopment disorder" or "bipolar disorder" or "substance related disorder").ti. **508039**
- 7 4 and 5 and 6 **351**
- 8 limit 7 to (english language and yr="2010 - 2023") **256**
